# Supplementary material for: Nanodrug regulates lactic acid metabolism to reprogram the immunosuppressive tumor microenvironment for enhanced cancer immunotherapy
Source: Royal Society of Chemistry journal article supplement (doi:10.1039/d2bm00650b), 2022-01-01
Supplement: d2bm00650b1.pdf [file d2bm00650b1.pdf]

## Supplementary Materials for

### Nanodrug regulates lactic acid metabolism to reprogram the immunosuppressive tumor microenvironment for enhanced cancer immunotherapy

Lirong Tian<sup>a,†</sup>, Minzhao Lin<sup>a,†</sup>, Huihai Zhong<sup>a</sup>, Yujun Cai<sup>a</sup>, Bo Li<sup>c</sup>, Zecong Xiao<sup>b,\*</sup> and Xintao Shuai<sup>a,c,\*</sup>

\*Corresponding authors. E-mail: shuaixt@mail.sysu.edu.cn (X. T. Shuai);

xiao92826@hotmail.com (Z.C. Xiao)

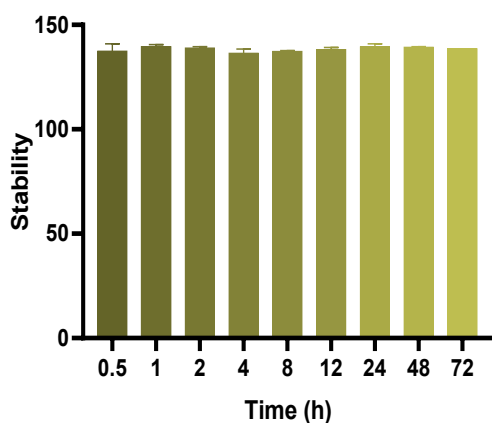

**Figure S1.** Stability of L@S/L in phosphate buffer saline (PBS) at 37°C. (mean ± SD; n = 3)

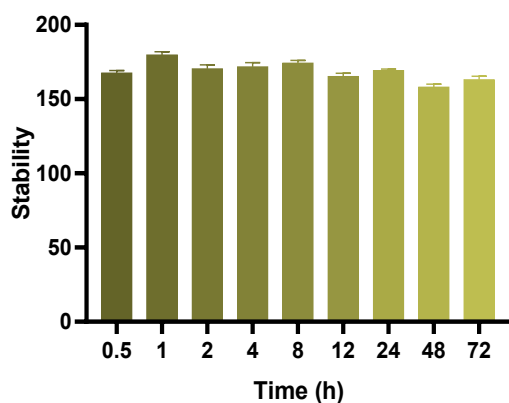

**Figure S2.** Stability of L@S/L in phosphate buffer saline (PBS) containing 10% FBS at 37°C. (mean ± SD; n

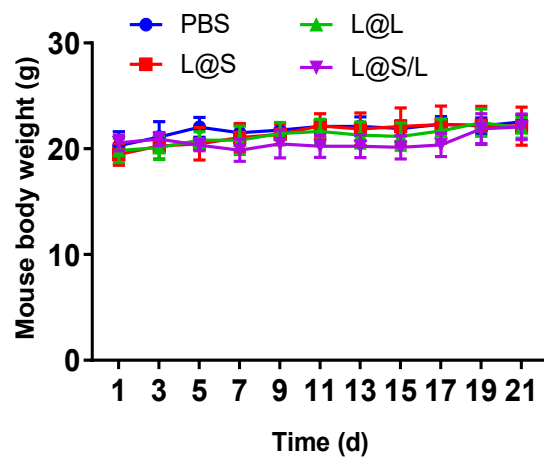

**Figure S3.** Changes of body weight during various treatments (mean  $\pm$  SD; n = 3).

**Table S1.** PDI of different liposomes of BL, L@L, L@S and L@S/L. (mean  $\pm$  SD; n = 3)

| Group | PDI               |
|-------|-------------------|
| BL    | 0.180 $\pm$ 0.001 |
| L@L   | 0.151 $\pm$ 0.020 |
| L@S   | 0.168 $\pm$ 0.016 |
| L@S/L | 0.101 $\pm$ 0.018 |

**Table S2.** PDI of L@S/L in phosphate buffer saline (PBS) at 37°C. (mean  $\pm$  SD; n = 3)

| Time (h) | PDI               |
|----------|-------------------|
| 0.5      | 0.167 $\pm$ 0.019 |
| 1        | 0.164 $\pm$ 0.013 |
| 2        | 0.170 $\pm$ 0.004 |
| 4        | 0.160 $\pm$ 0.011 |
| 8        | 0.167 $\pm$ 0.013 |
| 12       | 0.155 $\pm$ 0.017 |
| 24       | 0.156 $\pm$ 0.019 |
| 48       | 0.162 $\pm$ 0.008 |
| 72       | 0.124 $\pm$ 0.015 |

**Table S3.** PDI of L@S/L in phosphate buffer saline (PBS) containing 10% FBS at 37°C. (mean  $\pm$  SD; n = 3)

| Time (h) | PDI               |
|----------|-------------------|
| 0.5      | 0.135 $\pm$ 0.019 |
| 1        | 0.214 $\pm$ 0.008 |
| 2        | 0.165 $\pm$ 0.013 |
| 4        | 0.130 $\pm$ 0.035 |
| 8        | 0.178 $\pm$ 0.030 |
| 12       | 0.080 $\pm$ 0.028 |
| 24       | 0.118 $\pm$ 0.009 |
| 48       | 0.151 $\pm$ 0.036 |
| 72       | 0.169 $\pm$ 0.020 |
